1 **Combining serological assays and official statistics to describe the trajectory of the COVID-19**  
2 **pandemic: results from the EPICOVID19-RS study in Rio Grande do Sul (Southern Brazil)**

3

4 Fernando P. Hartwig<sup>1\*</sup>, Luís Paulo Vidaletti<sup>2</sup>, Aluísio J. D. Barros<sup>1,2</sup>, Gabriel D. Victora<sup>3</sup>, Ana M.  
5 B. Menezes<sup>1</sup>, Marília A. Mesenburg<sup>1,4</sup>, Bernardo L. Horta<sup>1</sup>, Mariângela F. Silveira<sup>1</sup>, Cesar G.  
6 Victora<sup>1,2</sup>, Pedro C. Hallal<sup>1</sup>, Claudio J. Struchiner<sup>5</sup>

7

8 <sup>1</sup>Postgraduate Program in Epidemiology, Federal University of Pelotas, Pelotas, Brazil.

9 <sup>2</sup>International Center for Equity in Health, Federal University of Pelotas, Pelotas, Brazil.

10 <sup>3</sup>Laboratory of Lymphocyte Dynamics, Rockefeller University, New York, NY, United States.

11 <sup>4</sup>Federal University of Health Sciences of Porto Alegre, Porto Alegre, RS, Brazil.

12 <sup>5</sup>Getúlio Vargas Foundation, Rio de Janeiro, Brazil.

13

14 \*Corresponding author. Postgraduate Program in Epidemiology, Federal University of Pelotas,  
15 Pelotas (Brazil) 96020-220. Phone: +55 (53) 3284-1300. E-mail: [fernandophartwig@gmail.com](mailto:fernandophartwig@gmail.com).

16

17 **ABSTRACT**

18 **Background:** The EPICOV19-RS study conducted 10 population-based surveys in Rio Grande  
19 do Sul (Southern Brazil), starting early in the epidemic. The sensitivity of the rapid point-of-  
20 care test used in the first eight surveys has been shown to decrease over time after some  
21 phases of the study were concluded. The 9<sup>th</sup> survey used both the rapid test and an enzyme-  
22 linked immunosorbent assay (ELISA) test, which has a higher and stable sensitivity.

23 **Methods:** We provide a theoretical justification for a correction procedure of the rapid test  
24 estimates, assess its performance in a simulated dataset and apply it to empirical data from  
25 the EPICOV19-RS study. COVID-19 deaths from official statistics were used as an indicator of  
26 the temporal distribution of the epidemic, under the assumption that fatality is constant over  
27 time. Both the indicator and results from the 9<sup>th</sup> survey were used to calibrate the temporal  
28 decay function of the rapid test's sensitivity from a previous validation study, which was used  
29 to estimate the true sensitivity in each survey and adjust the rapid test estimates accordingly.

30 **Results:** Simulations corroborated the procedure is valid. Corrected seroprevalence estimates  
31 were substantially larger than uncorrected estimates, which were substantially smaller than  
32 respective estimates from confirmed cases and therefore clearly underestimate the true  
33 infection prevalence.

34 **Conclusion:** Correcting biased estimates requires a combination of data and modelling  
35 assumptions. This work illustrates the practical utility of analytical procedures, but also the  
36 critical need for good quality, populationally-representative data for tracking the progress of  
37 the epidemic and substantiate both projection models and policy making.

38

39 **KEYWORDS:** COVID-19; SARS-CoV-2; seroprevalence; bias correction.

40           **1. INTRODUCTION**

41       Brazil concentrates 10% of all COVID-19 deaths in the world while having only 2.7% of the  
42       world's population. As of February 28, 2021, Brazil is the country ranking second and third in  
43       terms of deaths and confirmed cases, respectively. The situation was worsened the rapid  
44       spread of a new variant of the SARS-CoV-2 virus in the Amazon region in the North(1), which is  
45       already circulating in other regions of the country, including the South region(2). Rio Grande  
46       do Sul (the Southernmost state in Brazil) is facing the worst situation since the start of the  
47       pandemic, with infections increasing at unprecedented rates. In February 27 2021, all  
48       subregions of the state were, for the first time, classified as being in a critical situation based  
49       on a controlled social distancing model that uses several indicators and was launched by the  
50       State's Government in May 2020(3).

51       Rio Grande do Sul was one of the first regions in the world to have a large population-based  
52       assessment of the COVID-19 epidemic. According to official statistics, the first case and the  
53       first death in the State occurred in February 29 and March 24, 2020, and the first of a series of  
54       10 serological surveys (collectively referred to as the EPICOVID19-RS study(4)) in the State was  
55       caried out in April 11-13, 2020(5). Although a series of surveys starting so early on is useful for  
56       accurately tracking the progression of the epidemic, tests then available that were suitable for  
57       population-based studies had only been tested in recently infected individuals. In the  
58       EPICOVID19-RS study, a rapid point-of-care test was used. Prior to the 1<sup>st</sup> survey, available  
59       validation studies indicated the test's performance was sufficiently high for population-based  
60       studies(6). However, future validation studies detected that the sensitivity of this test  
61       decreases over time(7), an assessment that was only possible after some time since the  
62       beginning of the pandemic. In the 9<sup>th</sup> survey, we used an enzyme-linked immunosorbent assay  
63       (ELISA), which has higher sensitivity than the rapid test that does not decrease over time<sup>7-8</sup>.  
64       Changing tests between surveys hampers comparing different surveys, thus requiring  
65       analytical procedures to properly utilize previous estimates based on the rapid test in  
66       combination with the ELISA test to obtain a coherent picture of the pandemic in the state.

67       External data are extremely useful to furnish procedures to correct biased estimates. The more  
68       data the lower the need for modelling assumptions. Typically, such data stems from official  
69       statistics, such as registered cases, deaths, hospitalizations and other indicators. However,  
70       such data have their own limitations, including dependence of testing policies and protocols,  
71       fatality rate, change in treatment protocols, incompleteness and other factors that may  
72       change both over time and among different locations.

73       Obtaining a coherent and likely more accurate temporal trend of how the epidemic in a given  
74       location using real data is therefore a challenging task, requiring simultaneously and  
75       coherently using different and imperfect sources of data, including official statistics, different  
76       diagnostic tests and information from validation studies. This paper aims at obtaining the  
77       cumulative prevalence of infection in Rio Grande do Sul from a series of nine population-based  
78       serological surveys using a test with temporal variation in sensitivity.

79           **2. METHODS**

80           **2.1. Theoretical justification for the correction procedure**

81       Let  $F(t) = \int_0^t f(x) dx$  denote the cumulative number of infections at time  $t$ , where  $f(x)$  is a  
82       non-zero function for the infection incidence (in number of new cases) and  $t = 1$  is the day of  
83       the first infection, so that  $F(1) \geq 1$  and  $F(t) = 1$  for some  $t \in (0,1]$ . Let  $g(t^*) \in [0,1]$  denote

84 a function for the proportion of infections detectable  $t^*$  days after occurring. Therefore,  
 85  $W(t) = \int_0^t f(x)g(t-x) dx$  represents the cumulative number of infections detectable at  
 86 time  $t$ . We assume the population size  $N$  is constant throughout the pandemic. In this case,  
 87  $\frac{F(t)}{N}$  and  $\frac{W(t)}{N}$  respectively denote the true and apparent (detectable) cumulative prevalence of  
 88 infections at time  $t$ .

89 From the notation above, the proportion of infections that are still detectable (i.e., the  
 90 sensitivity) in day  $t$  is:

$$91 \quad D(t) = \frac{W(t)}{F(t)} = \frac{\int_0^t f(x)g(t-x) dx}{\int_0^t f(x) dx} \quad (1).$$

92 Equation 1 can be interpreted as a weighted average of the proportion of detectable  
 93 infections, where the weights correspond to the number of infections that occurred in each  
 94 short interval  $[t, t + dt]$ , where  $dt$  is a very small positive number.

95 Let  $h(t) = cf(t) \Rightarrow H(t) = cF(t)$ , where  $c$  is an unknown positive constant.  $h(t)$  can  
 96 denote, for example, the number of deaths, assuming that fatality is constant over time. In this  
 97 case,  $t$  represents the time when the infection happened, so that  $h(t)$  denote the number of  
 98 new cases which ended up dying. If  $h(t)$  denotes the number of deaths in time  $t$ , then the  
 99 appropriate representation would be  $h(t-k) = cf(t)$ , where  $k$  denotes the number of days  
 100 between infection and death.

101 Substituting  $h(t)$  for  $f(t)$  in equation 1 yields:

$$102 \quad \frac{\int_0^t h(x)g(t-x) dx}{\int_0^t h(x) dx} = \frac{\int_0^t cf(x)g(t-x) dx}{\int_0^t cf(x) dx} = \frac{\int_0^t f(x)g(t-x) dx}{\int_0^t f(x) dx} = D(t).$$

103 That is, the proportion of infections that are still detectable  $t^*$  days after occurring can also be  
 104 obtained using any indicator of the temporal distribution of infections, assuming that such  
 105 indicator is a scaled version of  $F(t)$ .

106 If both that  $g(t^*)$  and some function  $H(t)$  are known,  $g(t^*)$  can used to account for the decay  
 107 in sensitivity over time, and  $H(t)$  can used to account for the temporal distribution of the  
 108 pandemic. However, in practice, typically only  $H^\#(t) = \sum_{x=1}^t h^\#(x)$ , where  $h^\#(x)$  is the  
 109 number of deaths that occurred in a given day, is known. From this definition,  $h^\#(t) =$   
 110  $H(t-1) - H(t) = \int_{t-1}^t h(x) dx$  and  $H^\#(t) = H(t)$  for  $t \in \mathbb{N}^*$ . Since the exact time of the  
 111 events within a day are unknown, an approximation can be made by assigning  $t^* = t^s - t$  to  
 112 all events that happened in day  $t$ , where  $t^s$  denotes the date when individuals were tested.  
 113 This is a good approximation because the  $g(t^*)$  is unlikely to substantially change within a day  
 114 – that is,  $g(t^*) \approx g(t^* + 1)$ .

115

116 From the above,  $D(t)$  and  $F(t)$  can be approximated as follows:

$$D(t) \approx \bar{D}(t) = \frac{\sum_{x=1}^t h^\#(x) \hat{g}(t-x)}{\sum_{x=1}^t h^\#(x)} \quad (2)$$

$$F(t) \approx \bar{F}(t) = \frac{\hat{W}(t)}{\bar{D}(t)} \quad (3)$$

117 Similar to  $D(t)$  in equation 1,  $\bar{D}(t)$  in equation 2 can be interpreted as a weighted average of  
118 the proportion of detectable infections, where the weights correspond to the number of  
119 infections that occurred in each day.

120 In practice,  $h^\#(x)$  can be obtained from official statistics. However, the assumption that  $c$  is  
121 constant over time is required for equation 2 to yield a good approximation of  $F(t)$ . If this is  
122 not the case, then  $c$  should be replaced with  $c(t)$ . Moreover, it is unlikely that  $g(t^*)$  is known  
123 in practice. However, it can be estimated, for example, in validation studies. Therefore,  $\hat{g}(t^*)$   
124 is included in equation 2 instead of  $g(t^*)$ . Finally, equation 3 includes  $\hat{W}(t)$ , which is the  
125 estimated apparent cumulative number of infections estimated using a test with sensitivity  
126 that decreases over time, according to  $g(t^*)$ .

## 127 2.2. Simulation study

128 For the simulations,  $f(t) = e^{-0.0002t^2 + 0.0848t}$ , thus yielding ~1 million individuals who got  
129 infected at some point during a one-year period. The population size was 11 million  
130 individuals. Fatality rate was 1% and constant over time. These numbers are roughly of  
131 comparable magnitude to the first year of the epidemic in Rio Grande do Sul.

132 Individual  $i$  (where  $i$  denotes a generic individual who was infected at some point) was  
133 detectable by the Wondfo test at time  $t$  if  $T_{1i} + T_{2i} + T_{3i} \leq t < T_{1i} + T_{2i} + T_{3i} + T_{4i}$ , where:

- 134 •  $T_1$  is the infection date (defined as described above).
- 135 •  $T_2 \sim \text{Weibull}(\frac{1}{0.11}, 1.97)$  is the incubation time<sup>9-10</sup>.
- 136 •  $T_3 \sim N(13.3, 32.49)$  is the time from symptom onset to seroconversion(11).
- 137 •  $T_4 \sim \text{Weibull}(68.383320, 1.183745)$  is the time from seroconversion to seroreversion(12).
- 138 •  $T_5$  is the time from symptom onset to diagnosis. This was estimated using official statistics  
139 (see below for a description of these data) as the time difference between the dates of  
140 diagnosis and of symptom onset. For the present analyses, values greater than 21 days  
141 were discarded.

142 Regarding fatality, 1% of the infected individuals were randomly selected as those who died.  
143 To define when individuals died, we defined the following transition times:

- 144 •  $T_6$  is the time from diagnosis to death. This was estimated using official statistics (see below  
145 for a description of these data) as the time difference between the dates of death and of  
146 diagnosis.

147 Among individuals who died in the simulation study, values for  $T_5 - T_6$  were generated by  
148 sampling from their empirical joint distribution obtained from official statistics, restricting to  
149 those diagnosed with RT-PCR and died. For individuals who did not die in the simulation study  
150  $T_5$  values were generated by sampling from official statistics, restricting to those diagnosed  
151 with RT-PCR and did not die. Therefore, this sampling scheme allows for violations of the  
152 assumption that such times are similar between these subgroups. This may introduce some  
153 bias in the corrected estimates, and the simulation study will help to quantify how much this  
154 bias is likely to affect empirical analysis.

155 If individual  $i$  is one of those who died, if  $t \geq T_{1i} + T_{2i} + T_{5i} + T_{6i}$ , then the  $i$ th individual was  
156 deceased at time  $t$ . Of note, all times were rounded to the nearest integer, and negative  
157 values in  $T_3$  were replaced with zero.

158 In the simulations, the population size decreases over time as infected individuals die. Deaths  
159 due to other causes were not considered because we assumed that, aside from the epidemic,  
160 the population size is constant over time. The parameter of interest is  $\frac{F(t)}{N}$ , where  $N$  is assumed  
161 to be constant over time. Therefore, this is another source of (likely slight bias) in the  
162 estimates, and such bias will be quantified in the simulations.

163 To generate  $g(t^*)$ , a hypothetical validation study involving 20 million individuals, all enrolled  
164 in the day they were infected and each followed up for 400 days, was simulated by  
165 independently sampling 20 million values for  $T_2$ - $T_4$  from their respective distributions.  
166 Therefore, if  $T_{2i} + T_{3i} - T_{5i} \leq t^* < T_{2i} + T_{3i} + T_{4i}$ , then individual  $i$  is detectable  $t^*$  days  
167 after diagnosis.  $g(t^*)$  was then defined as the proportion of individuals detectable  $t^*$  after  
168 diagnosis. Such large validation study essentially implies that there is negligible error due to  
169 sampling variability in  $\hat{g}(t^*)$ , such that  $\hat{g}(t^*) \approx g(t^*)$ .

170 We simulated a scenario of 4 population based serological surveys conducted at days  $t = 60$ ,  
171  $t = 120$  and  $t = 180$  and  $t = 240$ . For each survey, 5000 individuals were randomly sampled  
172 from the population. A total of 1000 datasets were simulated by sampling  $T_2$ - $T_6$  from their  
173 respective distributions and randomly allocating these values to the dataset of infected  
174 individuals.

175 The correction procedure was implemented as an iterated procedure. In each dataset, 2000  
176 iterations of the correction procedure for each survey were applied. In each iteration,  $H^\#(t)$   
177 values for  $T_2$  were sampled from its distribution. These were subtracted from the date of  
178 symptom onset, which is assumed to be known for each death (as in our empirical application).  
179 This yields a distribution of when individuals who died were infected, which is a valid indicator  
180 of the relative temporal distribution of all infections under the assumption that fatality rate is  
181 constant over time. This relative temporal distribution, in combination with the sensitivity  
182 function  $g(t^*)$ , was then used to calculate  $\bar{D}(t)$  and  $\bar{F}(t)$ .

### 183 **2.3. Data sources**

#### 184 **2.3.1. EPCOVID19-RS study**

185 The EPICOVID19-RS study is a series of 10 large, population-based surveys aiming at tracking  
186 the COVID-19 pandemic in Rio Grande do Sul. For this paper, only surveys 1 to 9 will be used.  
187 Data collection for the 1<sup>st</sup> and 9<sup>th</sup> surveys occurred in April 11-13 2020 and February 5-7 2021,  
188 respectively. The study involves nine sentinel cities – that is, the largest city from each one of  
189 the eight intermediate regions of the state as defined by the Brazilian Institute of Geography  
190 and Statistics (IBGE). The exception was the metropolitan region, for which two cities (the  
191 state capital and an additional city) were selected. In each city, 50 census tracts (delimited  
192 areas with approximately 300 households each in urban area, also defined by the IBGE) were  
193 selected with probability proportional to size and ensuring geographical representativity. In  
194 each tract, 10 households were systematically selected. Between surveys, different households  
195 were selected within the same tracts. One individual per households was randomly selected  
196 for interview and testing using the rapid point-of-care lateral-flow WONDFO SARS-CoV-2  
197 Antibody Test (Wondfo Biotech Co., Guangzhou, China), which assesses both IgG and IgM

198 antibodies against SARS-CoV-2. More details on the study protocol are available elsewhere(4).  
199 For the present analysis, individuals with inconclusive test results were excluded.

### 200 **2.3.2. Official statistics data**

201 Official statistics data were collected from a dashboard by the Health Secretariat of Rio Grande  
202 do Sul website (<https://covid.saude.rs.gov.br/>) for the period between February 29, 2020 (the  
203 day of the first confirmed case in the State) and February 28, 2021. All 497 city-level health  
204 secretariats in Rio Grande do Sul provide information daily on several indicators relevant for  
205 monitoring the pandemic in the state, and this information is publicly available per day and per  
206 city. We used the daily absolute number of new deaths attributed to COVID-19 as an indicator  
207 of the relative temporal distribution of infections in the State. As discussed above, this is only  
208 valid under the assumption that fatality is constant over time. We also obtained the daily  
209 absolute number of confirmed infections to calculate the cumulative prevalence of confirmed  
210 infections for comparison with our corrected estimates.

211 The cities included in the survey have different population sizes, but all received the same  
212 weight in the study (see below for a justification for this). Therefore, weights for each city were  
213 generated for the official statistics dataset as the multiplicative inverse of the number of  
214 deaths in the corresponding city. This ensures that the distribution of deaths in each city has  
215 the same weight in the overall distribution of deaths. A similar weighting scheme was used  
216 when calculating the cumulative prevalence of confirmed infections.

## 217 **2.4. Statistical analysis**

### 218 **2.4.1. General description**

219 The goal of the analysis is to combine different data sources to obtain a plausible temporal  
220 description of the cumulative prevalence of SARS-CoV-2 infections in Rio Grande do Sul. The  
221 main difficulty is that, in the first eight EPICOVID19-RS surveys, only the Wondfo test was used,  
222 while both Wondfo and ELISA tests were used. The difficulty stems from the fact that,  
223 according to validation studies, the sensitivity of the Wondfo test decreases over time(7).  
224 Therefore, any Wondfo seroprevalence estimate after the very beginning of the pandemic is  
225 likely to be an underestimate in comparison to the ELISA test.

226 It is in principle possible to use the results from the validation study to account for this  
227 temporal decay in sensitivity, so that sensitivity is assumed to be smaller in later surveys based  
228 on some indicator of the temporal distribution of the epidemic, and therefore correction  
229 procedures will have a stronger impact on estimates from later surveys. In the 9<sup>th</sup> survey, the  
230 Wondfo seroprevalence was  $\frac{92}{4499} \approx 2.04\%$ , while the ELISA seroprevalence was  $\frac{443}{4445} \approx 9.97\%$ .  
231 This difference in estimated seroprevalence is not compatible with our validation study,  
232 suggesting that sensitivity of the Wondfo test in the field was lower than in the validation  
233 study (possibly to the lower prevalence of highly symptomatic and/or severe infection cases in  
234 the field, which could influence seroconversion and duration of antibodies over time)(13).

235 Therefore, the analysis requires two main steps:

- 236 a) Calibrating the results from the validation study so that the sensitivity it provides for the 9<sup>th</sup>  
237 survey corresponds to the observed sensitivity, itself estimated by comparing the Wondfo  
238 and ELISA estimates in the 9<sup>th</sup> survey (this simplified procedure for estimating sensitivity is  
239 justified below).

240 b) Use the indicator and the calibrated temporal decay in sensitivity to obtain corrected  
241 estimates for surveys 1-8. These corrected estimates can be interpreted as the expected  
242 estimates had ELISA been used.

243 We now describe each one of these steps in detail.

#### 244 **2.4.2. Calibrating the temporal decay in sensitivity**

245 The validation study (details on study design are provided in the Supplement) had data on the  
246 date of diagnosis by RT-PCR and of testing by the Wondfo test (thus yielding the time between  
247 diagnosis and testing), but not of symptom onset. Therefore, the validation study was re-  
248 analyzed in each iteration of the correction procedure. In each iteration:

- 249 • The validation study data was resampled without replacement. This allows incorporating  
250 sampling variability in the validation study itself as in a non-parametric bootstrap  
251 procedure.
- 252 •  $T_2$  and  $T_5$  values were generated and added to the time between diagnosis and testing in  
253 the resampled dataset to generate  $t^*$ .
- 254 • A model for the change in sensitivity over time was then fitted by an automated model  
255 selection procedure (see the Supplement for details).
- 256 • Since the validation study lacked data on sensitivity of the Wondfo test for recent  
257 infections, extrapolation for the smallest value of  $t^*$  in the dataset to  $t^* = 0$  was required.  
258 However, the observed data does not capture the increase in sensitivity during the first  
259 days following infection. This gap in the range of  $t^*$  was imputed by assuming that  
260 sensitivity from  $t^* = 0$  (assumed to be 1%) to the smallest value of  $t^*$  (using the predicted  
261 sensitivity from the model) in the given iteration has a logit-linear relationship.

262 The process above generated (in each iteration)  $\hat{g}'(t^*)$ , which is the function describing how  
263 sensitivity decreased over time in the validation study. As discussed above, the observed  
264 differences in seroprevalence estimates from the Wondfo and ELISA tests in the 9<sup>th</sup> survey  
265 were not compatible with our validation study. To account for this difference, we calibrated  
266  $\hat{g}'(t^*)$  into  $\hat{g}(t^*) = r[\hat{g}'(t^*)]$ , where  $0 < r < 1$ .

267 The calibration procedure was performed by finding the value of  $r$  using a one dimensional  
268 optimization algorithm such that  $\bar{D}(t_9)$  (where  $t_9$  is the date of the 9<sup>th</sup> survey) is virtually  
269 identical to  $\frac{\hat{\rho}_{W_9}}{\hat{\rho}_{E_9}} \approx 20.52\%$  (where  $\rho_{W_9}$  and  $\rho_{E_9}$  respectively denote the seroprevalence as  
270 measured by the Wondfo and ELISA tests in the 9<sup>th</sup> survey), which is an estimate of the  
271 sensitivity of the Wondfo test in the 9<sup>th</sup> survey. This process ensures that  $\bar{D}(t_9)$  is (virtually)  
272 identical to the sensitivity in the last survey, thus making  $\hat{g}(t^*)$  and field estimates of  
273 sensitivity more compatible.

274 Importantly, this calibration procedure is arbitrary because many other transformations of  
275  $\hat{g}'(t^*)$  could be used. We decided to simply scale  $\hat{g}'(t^*)$  by a multiplicative constant because  
276 this is a simple procedure that is rank preserving, therefore retaining the overall trends of the  
277 original function. However, the calibration procedure is entirely numerical, thus being agnostic  
278 to biological considerations. Nevertheless, the calibration does return a sensitivity curve that is  
279 at least compatible to field estimates, which is the goal of the calibration procedure.

#### 280 **2.4.3. Correcting the Wondfo estimates from surveys 1-8**



281 As described above, the temporal distribution of deaths was used as an indicator of the  
282 temporal distribution of the epidemic. However, because the official statistics dataset does not  
283 have data when infection occurred (which is indeed virtually impossible to ascertain), the  
284 correction procedure was implemented as an iterated process. In each iteration,  $T_2$  values  
285 were generated and subtracted from the date at symptom onset (available in the official  
286 statistics dataset), thus yielding the infection date  $t$ .

287 To calculate corrected cumulative prevalence estimates (denoted by  $\hat{\rho}_{E_k}$ ) in surveys 1-8,  
288 sensitivity (denoted by  $\bar{D}(t_k)$ ) was calculated as the weighted average of  $\hat{g}(t^*)$  over the period  
289 from February 29, 2020 to the given survey, where the weight that each date receives is the  
290 sum of the weights (described in section 2.3.2) of all deaths with infection occurring in the  
291 given date.  $\bar{D}(t_k)$  was then applied to the following formula:  $\hat{\rho}_{E_k} = \frac{\hat{\rho}_{W_k}^{-(1-\hat{\epsilon}_k)}}{(\bar{D}(t_k) + \hat{\epsilon}_k - 1)}$ , (14) where  
292  $\rho_{E_k}$  and  $\rho_{W_k}$  denote the seroprevalence as measured by the ELISA and Wondfo tests  
293 (respectively) in the  $k$ th survey; and  $\hat{\epsilon}_k$  is the specificity of the Wondfo test in the  $k$ th survey.  
294 We assumed  $\hat{\epsilon}_k = 1$  in all surveys, so the formula simplifies to  $\hat{\rho}_{E_k} = \frac{\hat{\rho}_{W_k}}{\bar{D}(t_k)}$ .

295 The strategy outlined above assumes that specificity of the Wondfo test is 100%. Although this  
296 is a strong assumption, it can be justified in this context as follows. First,  $1 - \hat{\rho}_{W_1} = 1 -$   
297  $\frac{2}{4149} \approx 99.95\%$ , which is a lower bound for the test's specificity since it was applied in the  
298 field. Second, although we have no data on how specificity changes over time, it is likely to  
299 increase because the sensitivity decreases. Therefore,  $\hat{\epsilon}_k = 1$  is likely a good approximation in  
300 this situation, which justifies estimating  $\bar{D}(t_9)$  as  $\frac{\hat{\rho}_{W_9}}{\hat{\rho}_{E_9}}$ , simplifies the formula for calculating  $\hat{\rho}_{E_k}$   
301 and prevents it from yielding negative values. Although the formula could still yield  $\hat{\rho}_{E_k}$  values  
302 larger than 100%, this cannot happen in the current application because  $\max(\hat{\rho}_{W_k}) = \hat{\rho}_{W_9} \approx$   
303  $2.04\%$  and  $\min(\hat{\rho}_{E_k}) = \bar{D}(t_9) \approx 20.52\%$ , and  $\frac{2.04}{20.52} \approx \hat{\rho}_{E_9}$ . We also performed a subset of the  
304 analysis using a likelihood-based approach (described in detail elsewhere(15)) and obtained  
305 very similar results.

306 Confidence intervals of the corrected estimates for surveys 1 to 8 incorporated the different  
307 sources of uncertainty in a bootstrap procedure (see Supplement for details). All analyses were  
308 performed using R 4.0.2.

### 309 3. RESULTS

310 Table 1 displays the results of the simulation study. In comparison to the apparent prevalence,  
311 corrected prevalence estimates were on average much closer to the true prevalence.  
312 Corrected estimates were slightly biased upwards, but both bias and absolute deviation (that  
313 is, the average absolute distance from the true prevalence) were of small magnitude.

314 Figure 1 shows the cumulative prevalence of infections. The solid line represents the  
315 cumulative prevalence of confirmed infections. Estimates from the Wondfo test were not only  
316 substantially smaller than corrected estimates (especially for later surveys), but also presented  
317 a different overall pattern that would not resemble the remaining results even upon scaling.  
318 Moreover, Wondfo estimates were implausible when compared to the cumulative prevalence  
319 of infection according to official cases. Up to the 8<sup>th</sup> survey, the Wondfo and official cumulative  
320 prevalence estimates were similar in the additive scale, but in the 9<sup>th</sup> survey the Wondfo  
321 estimate was substantially smaller than the estimate from official statistics, which is a lower

322 bound of the true cumulative prevalence. Table 2 shows the seroprevalence estimates for each  
323 survey of the EPICOV19-RS study using the different methods.

#### 324 4. DISCUSSION

325 In this work, we combined data from official statistics, a series of nine population-based  
326 serological surveys and a validation study to estimate the cumulative prevalence of SARS-CoV-  
327 2 infection in the State of Rio Grande do Sul (Southern Brazil) by adjusting estimates from a  
328 rapid test into the expected result had the ELISA test been used instead. Corrected estimates  
329 are likely more plausible than estimates using the rapid test, especially when compared to  
330 confirmed cases from official statistics. The corrected result indicated that, as of late February  
331 2021, cumulative prevalence of confirmed cases corresponds to about half of all cases  
332 detected by ELISA.

333 Describing the temporal evolution of the epidemic is important for several reasons. First, the  
334 true number of infections is required for calculating several important quantities important for  
335 policy making, including fatality and hospitalization rates(16). Second, an accurate estimate of  
336 the temporal distribution allows better calculation of quantities required for projections using  
337 models of infection dynamics, such as the basic reproduction number and how it changes over  
338 time, especially after specific events such as lockdown measures or social events that may lead  
339 to overcrowding. Projections from disease dynamics models early in the pandemic were highly  
340 influential and were one of the few sources of information then available. Although important  
341 and useful, it must be noted that most early projects were necessarily based on preliminary  
342 estimates from other diseases or from small, non-representative studies. Moreover, it is  
343 difficult to *a priori* identify and incorporate all possible complex factors that may influence the  
344 temporal evolution of the epidemic, many of which are local and difficult to measure. One year  
345 after the first confirmed case in Rio Grande do Sul, there is substantial local data available  
346 from official statistics and the EPICOV19-RS study, thus allowing comparing initial projections  
347 to the real figures to refine future projection models, which can now use local, real-data  
348 estimates.

349 The study has considerable strengths. First, the EPICOV19-RS study is a unique resource that  
350 includes nine population-based seroprevalence surveys covered a period of about 10 months  
351 and begun shortly after the first confirmed case in the State. Second, the distribution of all but  
352 one of the transition times was based on local data. Third, the fact that both the rapid and the  
353 ELISA tests were used in the 9<sup>th</sup> survey allowed us to calibrate the sensitivity function with a  
354 result obtained in the field. Fourth, corrected results were more plausible than uncorrected  
355 estimates, which underestimated even the cumulative prevalence of confirmed cases after the  
356 8<sup>th</sup> survey.

357 An important limitation of the study is the need of many assumptions throughout the  
358 correction process, including: fatality ratio is constant over time; and the sensitivity function  
359 estimated in the validation study (which was enriched for symptomatic cases) is applicable to  
360 the field (which includes the general population) after a calibration procedure. It is not  
361 possible to empirically verify the assumption of constant fatality over time without making  
362 additional assumptions that may lead to circular reasoning. Regarding the sensitivity function,  
363 its validity can only be assessed by repeatedly applying the rapid test over time to individuals  
364 sampled from the general population who had been diagnosed with known date. Establishing  
365 such cohort would be logistically difficult and time consuming, requiring large initial sample  
366 sizes to identify enough infected individuals. It should also be mentioned that the ELISA test is

367 itself not perfect. Indeed, there is evidence indicating that some individuals do not  
368 seroconvert, and this may be associated with disease severity(13). Therefore, estimates  
369 presented here must be interpreted as the cumulative prevalence of positive ELISA tests rather  
370 than of true infections.

371 This study is not a definitive guide, but rather an example of the usefulness of integrating  
372 different sources to correct estimates from an imperfect test to obtain a more plausible  
373 temporal trend of the COVID-19 epidemic. Although the study demonstrates the practical  
374 importance of analytical procedures, it also highlights the critical importance of good data,  
375 including population-based estimates from initiatives such as the EPICOV19-RS study, which  
376 ideally should be performed using appropriate tests; extensive validation studies evaluating  
377 how different factors (such as time since diagnosis) can affect the test's performance; and  
378 good quality, transparent and freely accessible official statistics. Estimates from large and  
379 populationally-representative data sources with sufficiently fine temporal is the best way to  
380 track the progression of the pandemic and to substantiate policy making, and therefore  
381 obtaining such data should be supported by funders and governments.

## 382 REFERENCES

- 383 1. Sabino EC, Buss LF, Carvalho MPS, Prete CA, Crispim MAE, Fraiji NA, et al. Resurgence of  
384 COVID-19 in Manaus, Brazil, despite high seroprevalence. *Lancet*. 2021;397(10273):452–5.
- 385 2. Correio do Povo. RS identifica nove casos da variante P.1 da Covid-19. 2021 [cited 2021  
386 Mar 10]. Available from: <https://www.correiodopovo.com.br/noticias/geral/rs-identifica-nove-casos-da-variante-p-1-da-covid-19-1.575688>.
- 388 3. Governo do Rio Grande do Sul. RS em bandeira preta: veja o que muda em todas as  
389 regiões a partir de sábado, dia 27 - Portal do Estado do Rio Grande do Sul. [cited 2021 Mar  
390 10]. Available from: <https://www.estado.rs.gov.br/rs-em-bandeira-preta-veja-o-que-muda-em-todas-as-regioes-a-partir-de-sabado-dia-27>
- 392 4. Hallal PC, Horta BL, Barros AJD, Dellagostin OA, Hartwig FP, Pellanda LC, et al. Trends in  
393 the prevalence of COVID-19 infection in Rio Grande do Sul, Brazil: Repeated serological  
394 surveys. *Cienc e Saude Coletiva*. 2020;25(suppl 1):2395–401.
- 395 5. Silveira MF, Barros AJD, Horta BL, Pellanda LC, Victora GD, Dellagostin OA, et al.  
396 Population-based surveys of antibodies against SARS-CoV-2 in Southern Brazil. *Nat Med*.  
397 2020;26(8):1196–9.
- 398 6. Pellanda LC, da Ros Wendland EM, McBride AJA, Tovo-Rodrigues L, Ferreira MRA,  
399 Dellagostin OA, et al. Sensitivity and specificity of a rapid test for assessment of exposure  
400 to SARS-CoV-2 in a community-based setting in Brazil. *medRxiv*. 2020;doi:  
401 10.1101/2020.05.06.20093476.
- 402 7. Silveira MF, Mesenburg M, Dellagostin OA, Oliveira NR, Maia MAC, Santos FDS, et al.  
403 Time-Dependent Decay of Detectable Antibodies Against SARS-CoV-2: A Comparison of  
404 ELISA with Two Batches of a Lateral-Flow Test. *SSRN Electron J*.  
405 2021;doi:10.2139/ssrn.3757411.
- 406 8. Alvim RGF, Lima TM, Rodrigues DAS, Marsili FF, Bozza VBT, Higa LM, et al. An affordable  
407 anti-SARS-COV-2 spike protein ELISA test for early detection of IgG seroconversion suited  
408 for large-scale surveillance studies in low-income countries. *medRxiv*. 2020;doi:  
409 10.1101/2020.07.13.20152884.
- 410 9. Qin J, You C, Lin Q, Hu T, Yu S, Zhou XH. Estimation of incubation period distribution of

- 411 COVID-19 using disease onset forward time: A novel cross-sectional and forward follow-  
412 up study. *Sci Adv.* 2020;6(33):1202–16.
- 413 10. Dhouib W, Maatoug J, Ayouni I, Zammit N, Ghammem R, Fredj S Ben, et al. The incubation  
414 period during the pandemic of COVID-19: a systematic review and meta-analysis. *Syst Rev.*  
415 2021;10(1):1–14.
- 416 11. Borremans B, Gamble A, Prager KC, Helman SK, McClain AM, Cox C, et al. Quantifying  
417 antibody kinetics and rna detection during early-phase SARS-CoV-2 infection by time since  
418 symptom onset. *Elife.* 2020;9:1–27.
- 419 12. Herrington D, The COVID-19 Community Research Partnership Study Group. Duration of  
420 SARS-CoV-2 Sero-Positivity in a Large Longitudinal Sero-Surveillance Cohort: The COVID-19  
421 Community Research Partnership. *medRxiv.* 2021;10.1101/2021.01.27.21250615.
- 422 13. Van Elslande J, Oyaert M, Ailliet S, Van Ranst M, Lorent N, Vande Weygaerde Y, et al.  
423 Longitudinal follow-up of IgG anti-nucleocapsid antibodies in SARS-CoV-2 infected  
424 patients up to eight months after infection. *J Clin Virol.* 2021;136:104765.
- 425 14. Ahlbom A. *Introduction to Modern Epidemiology.* Chestnut Hill, MA, USA: Epidemiology  
426 Resources; 1984. 97 p.
- 427 15. Hallal PC, Hartwig FP, Horta BL, Silveira MF, Struchiner CJ, Vidaletti LP, et al. SARS-CoV-2  
428 antibody prevalence in Brazil: results from two successive nationwide serological  
429 household surveys. *Lancet Glob Heal.* 2020;8(11):e1390–8.
- 430 16. Gaye B, Fanidi A, Jouven X. Denominator matters in estimating COVID-19 mortality rates.  
431 *European Heart Journal.* 2020;41(37):3500.
- 432

433 **TABLES**

434

435 **Table 1. Performance of the correction procedure in the simulation study (averaged over**  
436 **1000 datasets).**

| <i>t</i> | True prevalence <sup>a</sup> | Apparent prevalence <sup>b</sup> | Corrected values        |                   |               |
|----------|------------------------------|----------------------------------|-------------------------|-------------------|---------------|
|          |                              |                                  | Prevalence <sup>c</sup> | Bias <sup>d</sup> | Absolute bias |
| 60       | 0.011%                       | 0.002%                           | 0.014%                  | 0.003 pp          | 0.022 pp      |
| 120      | 0.300%                       | 0.093%                           | 0.307%                  | 0.007 pp          | 0.114 pp      |
| 180      | 2.383%                       | 0.988%                           | 2.408%                  | 0.025 pp          | 0.274 pp      |
| 240      | 6.503%                       | 3.051%                           | 6.518%                  | 0.015 pp          | 0.416 pp      |

437 <sup>a</sup>True cumulative prevalence of infections.

438 <sup>b</sup>Cummulative prevalence of infections estimated using a test with decaying sensitivity.

439 <sup>c</sup>Cummulative prevalence of infections estimated by the correction procedure.

440 <sup>d</sup>Difference between true and corrected prevalence.

441 pp: Percent points.

442

443 **Table 2. Seroprevalence (%) estimates (95% confidence intervals) in Rio Grande do Sul for**  
444 **each survey.**

| Survey | Wondfo   |                  | ELISA    |                   |
|--------|----------|------------------|----------|-------------------|
|        | Method   | Values           | Method   | Values            |
| 1      | Measured | 0.05 (0.01-0.17) | Modelled | 0.26 (0.03-1.00)  |
| 2      | Measured | 0.13 (0.05-0.29) | Modelled | 0.61 (0.19-1.45)  |
| 3      | Measured | 0.22 (0.11-0.41) | Modelled | 0.94 (0.39-1.90)  |
| 4      | Measured | 0.18 (0.08-0.35) | Modelled | 0.74 (0.28-1.58)  |
| 5      | Measured | 0.47 (0.28-0.72) | Modelled | 2.12 (1.12-3.62)  |
| 6      | Measured | 0.96 (0.70-1.27) | Modelled | 4.15 (2.55-6.36)  |
| 7      | Measured | 1.22 (0.91-1.60) | Modelled | 4.82 (3.09-7.12)  |
| 8      | Measured | 1.38 (1.05-1.77) | Modelled | 5.15 (3.40-7.43)  |
| 9      | Measured | 2.04 (1.64-2.52) | Measured | 9.97 (9.03-10.96) |

445

446 **FIGURE**

447

448 **Figure 1. Cumulative prevalence of SARS-CoV-2 infection (according to the ELISA test) in Rio**  
449 **Grande do Sul (Southern Brazil) from February 29, 2020 to February 28, 2021.**

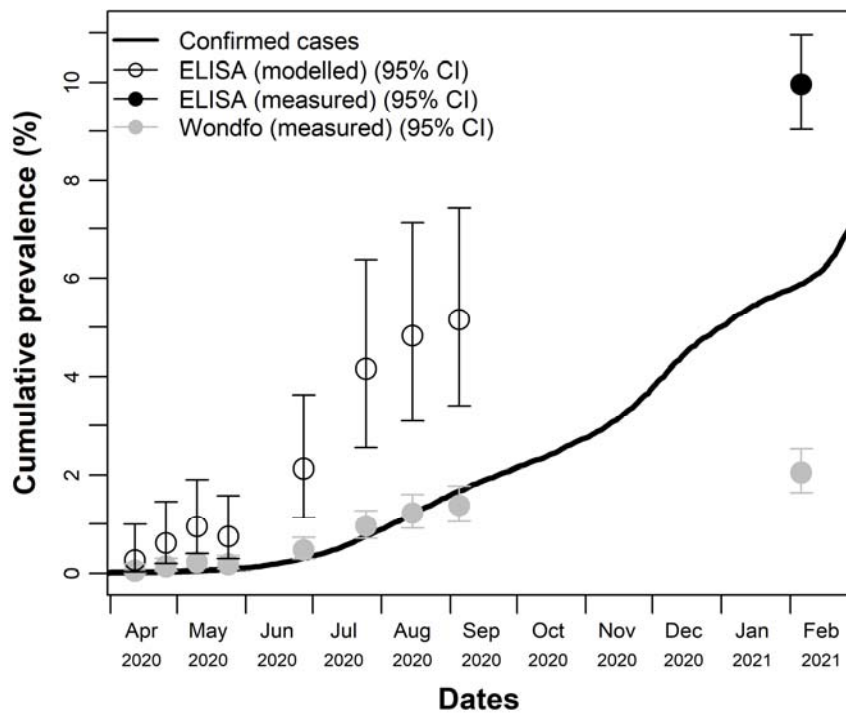

450
